# Supplementary material
Source: publisher site journal article supplement (https://www.dovepress.com/article/354733)
Supplement: Supplementary file 1 [file get_supplementary_file.php]

## Supplementary data 1: Predictor matrix

| Type | Response              | Predictors |         |     |        |     |                |          |     |        |                |         |      |     |      |         |     |       |      |        |    |       |         |     |        |
|------|-----------------------|------------|---------|-----|--------|-----|----------------|----------|-----|--------|----------------|---------|------|-----|------|---------|-----|-------|------|--------|----|-------|---------|-----|--------|
|      |                       | migr       | age_log | age | age_sb | sex | sex:Female:age | who_sqrt | who | who_sb | who:sex:Female | who:age | viol | ses | ptsd | ptsd_sb | edu | child | smok | bp_log | bp | bp_sb | hgt_log | hgt | hgt_sb |
| b    | <i>migr</i>           |            |         |     |        |     |                |          |     |        |                |         |      |     |      |         |     |       |      |        |    |       |         |     |        |
| c    | <i>age_log</i>        |            |         |     |        |     |                |          |     |        |                |         |      | 1   | 1    | 1       | 1   | 1     |      |        |    | 1     | 1       |     |        |
| pas  | <i>age</i>            |            | 1       |     |        |     |                |          |     |        |                |         |      |     |      |         |     |       |      |        |    |       |         |     |        |
| pas  | <i>age_sb</i>         |            |         | 1   |        |     |                |          |     |        |                |         |      |     |      |         |     |       |      |        |    |       |         |     |        |
| b    | <i>sex</i>            |            |         |     |        |     |                |          |     |        |                |         |      |     | 1    | 1       |     |       | 1    |        | 1  | 1     |         | 1   | 1      |
| pas  | <i>sex:Female:age</i> |            |         | 1   |        | 1   |                |          |     |        |                |         |      |     |      |         |     |       |      |        |    |       |         |     |        |
| c    | <i>who_sqrt</i>       |            |         | 1   | 1      | 1   | 1              |          |     |        |                |         | 1    | 1   | 1    | 1       |     |       |      |        |    |       |         |     |        |
| pas  | <i>who</i>            |            |         |     |        |     |                | 1        |     |        |                |         |      |     |      |         |     |       |      |        |    |       |         |     |        |
| pas  | <i>who_sb</i>         |            |         |     |        |     |                |          | 1   |        |                |         |      |     |      |         |     |       |      |        |    |       |         |     |        |
| pas  | <i>who:sex:Female</i> |            |         |     |        | 1   |                |          |     | 1      |                |         |      |     |      |         |     |       |      |        |    |       |         |     |        |
| pas  | <i>who:age</i>        |            |         | 1   |        |     |                |          | 1   |        |                |         |      |     |      |         |     |       |      |        |    |       |         |     |        |
| b    | <i>viol</i>           |            |         | 1   | 1      | 1   | 1              |          | 1   | 1      | 1              |         |      | 1   | 1    |         |     |       |      |        |    |       |         |     |        |
| o    | <i>ses</i>            |            |         | 1   | 1      | 1   | 1              |          | 1   | 1      | 1              |         |      | 1   | 1    |         |     | 1     |      |        |    |       |         |     |        |
| c    | <i>ptsd</i>           |            |         | 1   | 1      | 1   | 1              |          | 1   | 1      | 1              | 1       | 1    | 1   | 1    |         |     |       |      |        |    |       |         |     |        |
| pas  | <i>ptsd_sb</i>        |            |         |     |        |     |                |          |     |        |                |         |      |     | 1    |         |     |       |      |        |    |       |         |     |        |
| o    | <i>edu</i>            |            |         | 1   | 1      | 1   | 1              |          |     |        |                |         | 1    |     |      |         |     |       |      |        |    |       |         |     |        |
| o    | <i>child</i>          | 1          |         | 1   | 1      | 1   | 1              |          |     |        |                |         | 1    |     |      |         | 1   |       |      |        |    | 1     | 1       |     |        |
| b    | <i>smok</i>           | 1          |         |     |        | 1   |                |          |     | 1      | 1              |         | 1    |     |      |         |     |       |      |        |    | 1     | 1       |     | 1      |
| c    | <i>bp_log</i>         |            |         | 1   | 1      | 1   | 1              |          |     |        |                |         |      |     |      |         |     |       |      |        |    |       |         |     |        |
| pas  | <i>bp</i>             |            |         |     |        |     |                |          |     |        |                |         |      |     |      |         |     |       |      | 1      |    |       |         |     |        |
| pas  | <i>bp_sb</i>          |            |         |     |        |     |                |          |     |        |                |         |      |     |      |         |     |       |      |        | 1  |       |         |     |        |
| c    | <i>hgt_log</i>        |            |         |     |        | 1   |                |          |     |        |                |         |      |     | 1    | 1       |     |       | 1    |        | 1  | 1     |         |     |        |
| pas  | <i>hgt</i>            |            |         |     |        |     |                |          |     |        |                |         |      |     |      |         |     |       |      |        |    |       | 1       |     |        |
| pas  | <i>hgt_sb</i>         |            |         |     |        |     |                |          |     |        |                |         |      |     |      |         |     |       |      |        |    |       |         | 1   |        |

The predictor matrix details how each partially observed variable was imputed. Horizontally the variables enter as the response, vertically the variables enter as the predictor when the corresponding cell is “1”. The “type” column indicate how the variables should be modelled when entering as the response variable (b, binary; c, continuous; o, ordered/ordinal; pas, passive; u, unordered/nominal). Variables in italic are part of the substantive model; “:” denotes interaction between the variables on each side.
